# Supplementary material for: Application of Machine Learning Classification to Improve the Performance of Vancomycin Therapeutic Drug Monitoring
Source: MDPI journal article supplement (doi:10.3390/pharmaceutics14051023), 2022-05-09
Supplement: s1 [file s1]

**Table S1.** PK model and patient characteristics used for classifier training and internal validation.

| Reference                          | Patient population                                     | Parameters                  | Typical Value                                                    | IIV    | RUV                     | Patients for Classifier Learning<br>(Mean ± SD) | Patients for Internal Validation<br>(Mean ± SD) |
|------------------------------------|--------------------------------------------------------|-----------------------------|------------------------------------------------------------------|--------|-------------------------|-------------------------------------------------|-------------------------------------------------|
| Lim <i>et al.</i> , 2014           | Infection with MRSA                                    | CL                          | $3.96 \times (\text{CLCR}_{\text{BW}}/100)$                      | 40.1%  | P: 0.231 mg/L           | $4.21 \pm 2.16$                                 | $4.31 \pm 2.26$                                 |
|                                    |                                                        | V <sub>c</sub>              | 33.1                                                             | 35.7%  |                         | $34.69 \pm 10.62$                               | $34.6 \pm 10.48$                                |
|                                    |                                                        | V <sub>p</sub>              | 48.3                                                             | -      |                         | $48.3 \pm 0$                                    | $48.3 \pm 0$                                    |
|                                    |                                                        | Q                           | 7.48                                                             | 71.8%  |                         | $8.18 \pm 4.75$                                 | $8.02 \pm 4.74$                                 |
|                                    |                                                        | AUC <sub>Single Dose</sub>  |                                                                  |        |                         | $178.06 \pm 46.45$                              | $176.36 \pm 46.58$                              |
|                                    |                                                        | AUC <sub>Steady State</sub> |                                                                  |        |                         | $301.55 \pm 154.68$                             | $297.21 \pm 149.42$                             |
| Llopis-Salvia <i>et al.</i> , 2006 | critically-ill patients                                | CL                          | $0.034 \times \text{CLCR}_{\text{LBW}} + 0.015 \times \text{WT}$ | 29.2%  | P: 23.9%<br>A: 18.5%    | $3.42 \pm 1.44$                                 | $3.47 \pm 1.47$                                 |
|                                    |                                                        | V <sub>c</sub>              | $0.414 \times \text{WT}$                                         | 36.4%  |                         | $25.89 \pm 9.29$                                | $25.8 \pm 9.43$                                 |
|                                    |                                                        | V <sub>p</sub>              | $1.32 \times \text{WT}$                                          | 39.8%  |                         | $82.73 \pm 31.64$                               | $82.77 \pm 32.66$                               |
|                                    |                                                        | Q                           | 7.48                                                             | -      |                         | $7.48 \pm 0$                                    | $7.48 \pm 0$                                    |
|                                    |                                                        | AUC <sub>Single Dose</sub>  |                                                                  |        |                         | $180.74 \pm 50.47$                              | $180.43 \pm 52.05$                              |
|                                    |                                                        | AUC <sub>Steady State</sub> |                                                                  |        |                         | $346.79 \pm 152.72$                             | $341.91 \pm 151.09$                             |
| Moore <i>et al.</i> , 2016         | ECMO patients                                          | CL                          | $2.83 \times (1 + 0.0154 \times (\text{CLCR}_{\text{BW}} - 83))$ | 77%    | P: $\sigma^2 = 0.0067$  | $4.31 \pm 3.48$                                 | $4.45 \pm 3.55$                                 |
|                                    |                                                        | V <sub>c</sub>              | $24.2 \times (1 + 0.0638 \times (\text{WT} - 94.5))$             | 34%    |                         | $20.15 \pm 6.17$                                | $20.1 \pm 6.14$                                 |
|                                    |                                                        | V <sub>p</sub>              | $32.3 \times (1 + 0.0169 \times (\text{WT} - 94.5))$             | -      |                         | $14.88 \pm 5.86$                                | $15.26 \pm 5.86$                                |
|                                    |                                                        | Q                           | 11.2                                                             | -      |                         | $11.2 \pm 0$                                    | $11.2 \pm 0$                                    |
|                                    |                                                        | AUC <sub>Single Dose</sub>  |                                                                  |        |                         | $290.47 \pm 154.62$                             | $286.08 \pm 158.25$                             |
|                                    |                                                        | AUC <sub>Steady State</sub> |                                                                  |        |                         | $406.5 \pm 349.98$                              | $399.88 \pm 327.73$                             |
| Mulla <i>et al.</i> , 2005         | ECMO patients                                          | CL                          | $(4.3/\text{SCr}) \times \text{WT}$                              | 25%    | P: 12.1%<br>A: 2.1 mg/L | $4.07 \pm 1.48$                                 | $4.08 \pm 1.48$                                 |
|                                    |                                                        | V <sub>c</sub>              | $0.47 \times \text{WT}$                                          | 25%    |                         | $23.7 \pm 6.61$                                 | $24.27 \pm 6.87$                                |
|                                    |                                                        | V <sub>p</sub>              | $0.25 \times \text{WT}$                                          | 48%    |                         | $16.93 \pm 7.52$                                | $17.29 \pm 7.39$                                |
|                                    |                                                        | Q                           | $0.09 \times \text{WT}$                                          | 91%    |                         | $7.08 \pm 5.2$                                  | $7.01 \pm 5.37$                                 |
|                                    |                                                        | AUC <sub>Single Dose</sub>  |                                                                  |        |                         | $236.53 \pm 69.45$                              | $234.16 \pm 68.32$                              |
|                                    |                                                        | AUC <sub>Steady State</sub> |                                                                  |        |                         | $278.93 \pm 101.36$                             | $274.44 \pm 101.04$                             |
| Okada <i>et al.</i> , 2018         | patients undergoing allogeneic hematopoietic stem-cell | CL                          | $4.25 \times (\text{CLCR}_{\text{BSA adj.}}/113)^{0.7}$          | 25.2%  | P: 17.2%                | $4.07 \pm 1.25$                                 | $4.11 \pm 1.26$                                 |
|                                    |                                                        | V <sub>c</sub>              | $39.2 \times (\text{WT}/59.4)^{0.787}$                           | 14.2%  |                         | $41.04 \pm 7.5$                                 | $41.6 \pm 7.59$                                 |
|                                    |                                                        | V <sub>p</sub>              | 56.1                                                             | 66.9%  |                         | $64.63 \pm 35.2$                                | $64.51 \pm 35.45$                               |
|                                    |                                                        | Q                           | 1.95                                                             | -      |                         | $1.95 \pm 0$                                    | $1.95 \pm 0$                                    |
|                                    |                                                        | AUC <sub>Single Dose</sub>  |                                                                  |        |                         | $184.27 \pm 36.18$                              | $183.09 \pm 36.66$                              |
|                                    |                                                        | AUC <sub>Steady State</sub> |                                                                  |        |                         | $268.61 \pm 82.84$                              | $268.18 \pm 83.41$                              |
|                                    |                                                        | CL                          | $0.044 \times \text{CLCR}_{\text{BW}}$                           | 35.78% | A: 4.51 mg/L            | $4.64 \pm 2.26$                                 | $4.67 \pm 2.17$                                 |

|                                    |                                                  |                             |                                                                                                              |        |          |                 |                 |
|------------------------------------|--------------------------------------------------|-----------------------------|--------------------------------------------------------------------------------------------------------------|--------|----------|-----------------|-----------------|
| Pur-wonugroho <i>et al.</i> , 2012 | hospitalized patients at any ward                | V <sub>c</sub>              | 0.542×Age                                                                                                    | 20.93% |          | 24.8 ± 8.85     | 24.36 ± 8.46    |
|                                    |                                                  | V <sub>p</sub>              | 44.2                                                                                                         | 57.27% |          | 49.33 ± 23.45   | 49.34 ± 23.02   |
|                                    |                                                  | Q                           | 6.95                                                                                                         | 39.5%  |          | 7.33 ± 2.47     | 7.47 ± 2.62     |
|                                    |                                                  | AUC <sub>Single Dose</sub>  |                                                                                                              |        |          | 179.14 ± 53.22  | 178.16 ± 52.81  |
|                                    |                                                  | AUC <sub>Steady State</sub> |                                                                                                              |        |          | 268.28 ± 131.56 | 264.01 ± 133.11 |
| Sánchez <i>et al.</i> , 2010       | hospitalized patients                            | CL                          | 0.157+0.563×CLCR <sub>BW</sub>                                                                               | 24.49% | P: 24.9% | 3.63 ± 1.49     | 3.73 ± 1.55     |
|                                    |                                                  | V <sub>c</sub>              | 0.283 × WT                                                                                                   | -      |          | 17.71 ± 3.04    | 17.91 ± 3.04    |
|                                    |                                                  | V <sub>p</sub>              | 32.2 × (Age/53.5)                                                                                            | 6.8%   |          | 27.13 ± 8.35    | 27.08 ± 8.34    |
|                                    |                                                  | Q                           | 0.111 × WT                                                                                                   | -      |          | 6.95 ± 1.19     | 7.03 ± 1.19     |
|                                    |                                                  | AUC <sub>Single Dose</sub>  |                                                                                                              |        |          | 244.01 ± 63.13  | 239.92 ± 62.26  |
|                                    |                                                  | AUC <sub>Steady State</sub> |                                                                                                              |        |          | 322.13 ± 131.43 | 319.04 ± 132.44 |
| Yamamoto <i>et al.</i> , 2009      | patients suffering from gram positive infections | CL                          | 3.83, if CLCR <sub>BW</sub> ≥ 85 mL/min<br>0.32×CLCR <sub>BW</sub> + 0.32, if CLCR <sub>BW</sub> < 85 mL/min | 37.5%  | E: 14.3% | 3.48 ± 1.36     | 3.56 ± 1.38     |
|                                    |                                                  | V <sub>c</sub>              | 0.478 × WT                                                                                                   | 18.2%  |          | 30.3 ± 7.14     | 30.44 ± 7.27    |
|                                    |                                                  | V <sub>p</sub>              | 60.6                                                                                                         | 72.8%  |          | 71.27 ± 41.82   | 72.11 ± 42.05   |
|                                    |                                                  | Q                           | 8.81                                                                                                         | 19.2%  |          | 8.94 ± 1.5      | 8.92 ± 1.5      |
|                                    |                                                  | AUC <sub>Single Dose</sub>  |                                                                                                              |        |          | 182.15 ± 49.14  | 179.3 ± 46.94   |
|                                    |                                                  | AUC <sub>Steady State</sub> |                                                                                                              |        |          | 336.06 ± 144.12 | 335.14 ± 140.28 |
| Yasuhara <i>et al.</i> , 1998      | Infection with MRSA                              | CL                          | 3.51, if CLCR <sub>BW</sub> > 85 mL/min<br>0.0478×CLCR <sub>BW</sub> , if CLCR <sub>BW</sub> ≤ 85 mL/min     | 38.5%  | E: 23.7% | 3.59 ± 1.25     | 3.64 ± 1.23     |
|                                    |                                                  | V <sub>ss</sub>             | 60.7                                                                                                         | 25.4%  |          | 18.09 ± 5.13    | 62.03 ± 13.53   |
|                                    |                                                  | k <sub>12</sub>             | 0.525                                                                                                        | -      |          | 44.09 ± 10.28   | 0.52 ± 0        |
|                                    |                                                  | k <sub>21</sub>             | 0.213                                                                                                        | 28.6%  |          | 9.5 ± 2.69      | 0.22 ± 0.05     |
|                                    |                                                  | AUC <sub>Single Dose</sub>  |                                                                                                              |        |          | 213.51 ± 48.28  | 211.36 ± 46.74  |
|                                    |                                                  | AUC <sub>Steady State</sub> |                                                                                                              |        |          | 315.42 ± 115.94 | 315.01 ± 117.39 |

Note: The number of patients for classifier learning and evaluation was 900,000 and 9,000, respectively. Abbreviations: CL, clearance;  $V_c$ , central volume of distribution;  $V_p$ , peripheral volume of distribution;  $Q$ , intercompartmental clearance;  $V_{ss}$ , volume of distribution at steady-state;  $k_{12}$ , first-order transfer rate constant from the central compartment to the peripheral compartment;  $k_{21}$ , first-order transfer rate;  $CLCR_{BW}$ , creatinine clearance using total body weight; sCr, serum creatinine;  $CLCR_{BSA \text{ adj.}}$ , creatinine clearance using the body weight adjusted by the body surface area; WT, total body weight; IIV, interindividual variability; RUV, residual unexplained variability; P, proportional; A, additive; E, exponential component; AUC, area under the drug concentration-time curve.

**Table S2.** Hyperparameter ranges used for tuning the machine learning (ML) models.

| Model         | Parameter        | Range                     |
|---------------|------------------|---------------------------|
| Decision Tree | minsplit         | 5, 6, 7, 8, 9, 10         |
|               | minbucket        | 2, 3                      |
|               | cp               | 0.01, 0.05                |
| Random Forest | mtry             | 1, 5, 10                  |
|               | splitrule        | gini, extratrees          |
|               | min.node.size    | 10, 20                    |
| XGBoost       | eta              | 0.025, 0.05, 0.1, 0.3     |
|               | max_depth        | 2, 3, 4, 5, 6             |
|               | subsample        | 0.5, 0.75, 1              |
|               | colsample_bytree | 0.5, 0.75, 1              |
|               | nrounds          | Every 50 from 200 to 1000 |

**Table S3.** PK model and patient characteristics in the external validation set.

| Reference                             | Patient population                                                    | Parameters                  | Typical Value                                                                                    | IIV**  | RUV**                      | Patients for External Validation (Mean ± SD) |
|---------------------------------------|-----------------------------------------------------------------------|-----------------------------|--------------------------------------------------------------------------------------------------|--------|----------------------------|----------------------------------------------|
| Bae <i>et al.</i> , 2019              | hospitalized patients                                                 | CL                          | $2.82 \times (\text{CLCR}_{\text{BW}}/72)^{0.836}$                                               | 40.1%  | P: 0.253 mg/L              | 4.21 ± 3.78                                  |
|                                       |                                                                       | V <sub>c</sub>              | 31.8                                                                                             | 35.7%  |                            | 31.8 ± 0                                     |
|                                       |                                                                       | V <sub>p</sub>              | 75.4 × (WT/70)                                                                                   | -      |                            | 85.69 ± 38.43                                |
|                                       |                                                                       | Q                           | 11.7                                                                                             | 71.8%  |                            | 11.7 ± 0                                     |
|                                       |                                                                       | AUC <sub>Single Dose</sub>  |                                                                                                  |        |                            | 165.18 ± 62.42                               |
|                                       |                                                                       | AUC <sub>Steady State</sub> |                                                                                                  |        |                            | 691.72 ± 1190.7                              |
| Dolton <i>et al.</i> , 2010           | patients with severe burn injuries                                    | CL                          | $4.7 \times (\text{CLCR}_{\text{LBW}}/6.53)$                                                     | 32.7%  | P: 29.3%<br>A: 0.2292 mg/L | 3.35 ± 1.7                                   |
|                                       |                                                                       | V <sub>c</sub>              | $68.4 \times (\text{WT}/70) - 31.8 \times \text{BUN}$                                            | 19.1%  |                            | 44.63 ± 21.72                                |
|                                       |                                                                       | V <sub>p</sub>              | $75.4 \times (\text{WT}/70)$                                                                     | 172.6% |                            | 107.54 ± 116.8                               |
|                                       |                                                                       | Q                           | 4.54                                                                                             | -      |                            | 4.54 ± 0                                     |
|                                       |                                                                       | AUC <sub>Single Dose</sub>  |                                                                                                  |        |                            | 191.23 ± 76.33                               |
|                                       |                                                                       | AUC <sub>Steady State</sub> |                                                                                                  |        |                            | 381.52 ± 197.16                              |
| Goti <i>et al.</i> , 2018             | hospitalized patients with high prevalence of end-stage renal disease | CL                          | $4.5 \times (\text{CLCR}_{\text{BW}}/120)^{0.8} \times 0.7^{\text{DIAL}}$                        | 39.8%  | P: 22.7%<br>A: 3.4 mg/L    | 3.8 ± 1.83                                   |
|                                       |                                                                       | V <sub>c</sub>              | $58.4 \times (\text{WT}/70) \times 0.5^{\text{DIAL}}$                                            | 81.6%  |                            | 58.57 ± 42.9                                 |
|                                       |                                                                       | V <sub>p</sub>              | 38.4                                                                                             | 57.1%  |                            | 42.87 ± 20.32                                |
|                                       |                                                                       | Q                           | 6.5                                                                                              | -      |                            | 6.5 ± 0                                      |
|                                       |                                                                       | AUC <sub>Single Dose</sub>  |                                                                                                  |        |                            | 177.6 ± 65.62                                |
|                                       |                                                                       | AUC <sub>Steady State</sub> |                                                                                                  |        |                            | 317.16 ± 155.94                              |
| Medellín-Garibay <i>et al.</i> , 2016 | trauma patients                                                       | CL                          | $0.49 \times \text{CLCR}_{\text{BW}}$ ,<br>$0.34 \times \text{CLCR}_{\text{BW}}$ , if furosemide | 37.0%  | P: 19.2%<br>A: 3.5 mg/L    | 2.9 ± 1.51                                   |
|                                       |                                                                       | V <sub>c</sub>              | $1.07 \times \text{WT}$ , if Age > 65 years<br>$0.74 \times \text{WT}$ , if Age ≤ 65 years       | 40.0%  |                            | 51.13 ± 20.08                                |
|                                       |                                                                       | V <sub>p</sub>              | $5.9 \times \text{WT}$                                                                           | -      |                            | 373.4 ± 63.32                                |
|                                       |                                                                       | Q                           | 0.81                                                                                             | -      |                            | 0.81 ± 0                                     |
|                                       |                                                                       | AUC <sub>Single Dose</sub>  |                                                                                                  |        |                            | 237.77 ± 72.79                               |
|                                       |                                                                       | AUC <sub>Steady State</sub> |                                                                                                  |        |                            | 436.31 ± 236.19                              |

Note: The number of evaluated patients was 4,000. Abbreviations: CL, clearance; V<sub>c</sub>, central volume of distribution; V<sub>p</sub>, peripheral volume of distribution; Q, intercompartmental clearance; CLCR<sub>BW</sub>, creatinine clearance using total body weight; CLCR<sub>LBW</sub>, creatinine clearance using lean body weight; WT, total body weight; BUN, a dichotomous covariate coded as BUN = 0 if the patients had burns; DIAL, a dichotomous covariate coded as DIAL = 0 if the patients were undergoing hemodialysis; IIV, interindividual variability; RUV, residual unexplained variability; P, proportional; A, additive component; AUC, area under the drug concentration-time curve.

**Table S4.** The confusion matrix of the decision tree (DT) model in each scenario.

[illegible]

[illegible]

### Peak, Mid, and Trough Sampling at Single Dose

[illegible]

### Peak, Mid, and Trough Sampling at Steady-State

[illegible]

### One-hour Interval Sampling at Single Dose

[illegible]

|                                                   |                            |     |     |     |     |     |     |     |     |     |
|---------------------------------------------------|----------------------------|-----|-----|-----|-----|-----|-----|-----|-----|-----|
|                                                   | Yamamoto et al., 2009      | 3.1 | 2.9 | 0.6 | 0.6 | 1.3 | 2.0 | 0.4 | 5.4 | 1.4 |
|                                                   | Yasuhara et al., 1998      | 2.8 | 6.0 | 3.0 | 3.3 | 0.3 | 5.8 | 6.5 | 3.2 | 7.8 |
| <b>One-hour Interval Sampling at Steady-State</b> |                            |     |     |     |     |     |     |     |     |     |
| <b>Predicted Class</b>                            | Lim et al., 2014           | 0.0 | 0.0 | 0.0 | 0.0 | 0.0 | 0.0 | 0.0 | 0.0 | 0.0 |
|                                                   | Llopis-Salvia et al., 2006 | 0.0 | 0.0 | 0.0 | 0.0 | 0.0 | 0.0 | 0.0 | 0.0 | 0.0 |
|                                                   | Moore et al., 2016         | 0.7 | 0.5 | 3.7 | 0.7 | 0.1 | 0.9 | 0.2 | 0.3 | 0.4 |
|                                                   | Mulla et al., 2005         | 1.1 | 1.7 | 2.3 | 4.6 | 0.6 | 2.2 | 3.5 | 1.2 | 1.7 |
|                                                   | Okada et al., 2018         | 6.3 | 3.8 | 1.6 | 4.0 | 9.4 | 3.9 | 1.9 | 4.7 | 2.3 |
|                                                   | Purwonugroho et al., 2012  | 0.5 | 0.6 | 0.7 | 0.3 | 0.0 | 1.9 | 1.2 | 0.3 | 1.2 |
|                                                   | Sánchez et al., 2010       | 0.0 | 0.0 | 0.0 | 0.0 | 0.0 | 0.0 | 0.0 | 0.0 | 0.0 |
|                                                   | Yamamoto et al., 2009      | 1.9 | 2.5 | 1.5 | 1.1 | 0.9 | 1.7 | 1.5 | 3.8 | 1.8 |
|                                                   | Yasuhara et al., 1998      | 0.6 | 2.1 | 1.3 | 0.3 | 0.0 | 0.6 | 2.9 | 0.7 | 3.6 |

**Table S5.** The precision, recall, and F1-Score of the decision tree (DT) model in each scenario.

| Sampling Scenarios               | Trough (%) |        |          | Peak and Trough (%) |        |          | Peak, Mid, and Trough (%) |        |          | One-hour Interval (%) |        |          |
|----------------------------------|------------|--------|----------|---------------------|--------|----------|---------------------------|--------|----------|-----------------------|--------|----------|
| Measures                         | Preci-sion | Recall | F1-Score | Preci-sion          | Recall | F1-Score | Preci-sion                | Recall | F1-Score | Preci-sion            | Recall | F1-Score |
| <b>Class in the Single Dose</b>  |            |        |          |                     |        |          |                           |        |          |                       |        |          |
| Lim et al., 2014                 | -          | 0.0    | -        | 40.0                | 24.3   | 30.2     | 46.2                      | 22.6   | 30.4     | 51.4                  | 18.4   | 27.1     |
| Llopis-Salvia et al., 2006       | 16.6       | 81.0   | 27.6     | -                   | 0.0    | -        | 29.9                      | 18.5   | 22.9     | -                     | 0.0    | -        |
| Moore et al., 2016               | 55.4       | 33.8   | 42.0     | 72.1                | 24.8   | 36.9     | 52.0                      | 41.0   | 45.9     | 68.9                  | 30.1   | 41.9     |
| Mulla et al., 2005               | -          | 0.0    | -        | -                   | 0.0    | -        | 28.4                      | 46.7   | 35.3     | 29.5                  | 37.5   | 33.0     |
| Okada et al., 2018               | -          | 0.0    | -        | -                   | 0.0    | -        | 33.2                      | 45.9   | 38.6     | 40.6                  | 75.6   | 52.9     |
| Purwonugroho et al., 2012        | 55.0       | 21.4   | 30.8     | -                   | 0.0    | -        | 56.1                      | 3.2    | 6.1      | 50.0                  | 0.3    | 0.6      |
| Sánchez et al., 2010             | 16.8       | 52.5   | 25.4     | 21.6                | 64.5   | 32.4     | 29.2                      | 23.1   | 25.8     | -                     | 0.0    | -        |
| Yamamoto et al., 2009            | -          | 0.0    | -        | 17.1                | 86.5   | 28.5     | 22.7                      | 73.4   | 34.7     | 30.3                  | 48.4   | 37.3     |
| Yasuhara et al., 1998            | -          | 0.0    | -        | -                   | 0.0    | -        | -                         | 0.0    | -        | 20.1                  | 69.8   | 31.2     |
| <b>Class in the Steady-State</b> |            |        |          |                     |        |          |                           |        |          |                       |        |          |
| Lim et al., 2014                 | -          | 0.0    | -        | -                   | 0.0    | -        | -                         | 0.0    | -        | -                     | 0.0    | -        |
| Llopis-Salvia et al., 2006       | -          | 0.0    | -        | -                   | 0.0    | -        | -                         | 0.0    | -        | -                     | 0.0    | -        |
| Moore et al., 2016               | 40.2       | 19.4   | 26.2     | 42.5                | 36.9   | 39.5     | 43.9                      | 39.3   | 41.5     | 49.6                  | 33.6   | 40.0     |
| Mulla et al., 2005               | -          | 0.0    | -        | -                   | 0.0    | -        | -                         | 0.0    | -        | 24.0                  | 41.0   | 30.3     |
| Okada et al., 2018               | 14.3       | 93.4   | 24.8     | 16.3                | 83.2   | 27.3     | 20.0                      | 72.3   | 31.3     | 24.8                  | 84.7   | 38.3     |
| Purwonugroho et al., 2012        | -          | 0.0    | -        | -                   | 0.0    | -        | 23.2                      | 21.0   | 22.0     | 27.9                  | 16.9   | 21.1     |
| Sánchez et al., 2010             | -          | 0.0    | -        | 21.3                | 31.0   | 25.2     | 23.1                      | 27.9   | 25.3     | -                     | 0.0    | -        |
| Yamamoto et al., 2009            | 19.3       | 38.3   | 25.7     | 22.3                | 35.4   | 27.4     | 19.3                      | 45.7   | 27.1     | 23.0                  | 34.4   | 27.5     |
| Yasuhara et al., 1998            | -          | 0.0    | -        | -                   | 0.0    | -        | -                         | 0.0    | -        | 29.7                  | 32.4   | 31.0     |



**Table S6.** The confusion matrix of the random forest (RF) model in each scenario.

| Actual Class (%)                                |                            | Lim et al.,<br>2014 | Llopis-Sal-<br>via et al.,<br>2006 | Moore et al.,<br>2016 | Mulla et al.,<br>2005 | Okada et al.,<br>2018 | Pur-<br>wonugroho<br>et al., 2012 | Sanchez et<br>al., 2010 | Yamamoto<br>et al., 2009 | Yasuhara et<br>al., 1998 |
|-------------------------------------------------|----------------------------|---------------------|------------------------------------|-----------------------|-----------------------|-----------------------|-----------------------------------|-------------------------|--------------------------|--------------------------|
| <b>Trough Sampling at Single Dose</b>           |                            |                     |                                    |                       |                       |                       |                                   |                         |                          |                          |
| Predicted Class                                 | Lim et al., 2014           | 1.3                 | 1.0                                | 0.5                   | 0.7                   | 1.2                   | 0.7                               | 1.0                     | 1.0                      | 0.8                      |
|                                                 | Llopis-Salvia et al., 2006 | 2.7                 | 4.4                                | 1.4                   | 1.3                   | 1.9                   | 1.5                               | 1.4                     | 2.8                      | 1.6                      |
|                                                 | Moore et al., 2016         | 0.3                 | 0.2                                | 4.5                   | 1.2                   | 0.1                   | 1.2                               | 0.5                     | 0.1                      | 0.4                      |
|                                                 | Mulla et al., 2005         | 0.4                 | 0.4                                | 0.6                   | 1.5                   | 0.3                   | 0.7                               | 1.2                     | 0.5                      | 0.9                      |
|                                                 | Okada et al., 2018         | 2.7                 | 2.4                                | 1.1                   | 1.9                   | 4.0                   | 1.5                               | 2.4                     | 2.8                      | 2.9                      |
|                                                 | Purwonugroho et al., 2012  | 0.1                 | 0.1                                | 0.4                   | 0.5                   | 0.1                   | 2.2                               | 0.0                     | 0.1                      | 0.1                      |
|                                                 | Sánchez et al., 2010       | 1.7                 | 0.9                                | 1.3                   | 2.4                   | 1.4                   | 1.5                               | 2.5                     | 1.4                      | 1.8                      |
|                                                 | Yamamoto et al., 2009      | 0.9                 | 0.9                                | 0.4                   | 0.5                   | 1.1                   | 0.6                               | 0.6                     | 1.2                      | 0.8                      |
|                                                 | Yasuhara et al., 1998      | 1.1                 | 0.8                                | 0.9                   | 1.1                   | 1.0                   | 1.1                               | 1.4                     | 1.2                      | 1.8                      |
| <b>Trough Sampling at Steady-State</b>          |                            |                     |                                    |                       |                       |                       |                                   |                         |                          |                          |
| Predicted Class                                 | Lim et al., 2014           | 1.0                 | 0.6                                | 0.7                   | 0.6                   | 0.7                   | 0.8                               | 0.9                     | 0.7                      | 0.6                      |
|                                                 | Llopis-Salvia et al., 2006 | 1.8                 | 2.3                                | 1.3                   | 1.2                   | 1.3                   | 1.1                               | 1.4                     | 1.9                      | 1.5                      |
|                                                 | Moore et al., 2016         | 0.7                 | 0.6                                | 3.4                   | 0.7                   | 0.1                   | 1.1                               | 0.3                     | 0.6                      | 0.5                      |
|                                                 | Mulla et al., 2005         | 1.6                 | 0.9                                | 1.1                   | 3.0                   | 1.9                   | 1.9                               | 1.6                     | 1.1                      | 1.8                      |
|                                                 | Okada et al., 2018         | 1.7                 | 1.8                                | 1.1                   | 2.0                   | 2.8                   | 1.9                               | 2.0                     | 1.6                      | 2.0                      |
|                                                 | Purwonugroho et al., 2012  | 0.6                 | 0.5                                | 0.4                   | 0.4                   | 0.6                   | 0.7                               | 0.8                     | 0.6                      | 0.6                      |
|                                                 | Sánchez et al., 2010       | 1.8                 | 1.6                                | 1.0                   | 1.7                   | 1.6                   | 1.6                               | 2.3                     | 1.2                      | 1.1                      |
|                                                 | Yamamoto et al., 2009      | 1.4                 | 1.9                                | 1.2                   | 0.8                   | 1.1                   | 1.1                               | 1.2                     | 2.2                      | 1.8                      |
|                                                 | Yasuhara et al., 1998      | 0.6                 | 0.9                                | 0.9                   | 0.8                   | 1.0                   | 0.7                               | 0.6                     | 1.3                      | 1.3                      |
| <b>Peak and Trough Sampling at Single Dose</b>  |                            |                     |                                    |                       |                       |                       |                                   |                         |                          |                          |
| Predicted Class                                 | Lim et al., 2014           | 3.1                 | 0.9                                | 0.1                   | 0.2                   | 1.0                   | 1.0                               | 0.3                     | 0.7                      | 0.9                      |
|                                                 | Llopis-Salvia et al., 2006 | 1.5                 | 3.1                                | 1.1                   | 1.2                   | 1.1                   | 1.1                               | 1.1                     | 1.4                      | 1.1                      |
|                                                 | Moore et al., 2016         | 0.4                 | 0.4                                | 5.4                   | 1.3                   | 0.2                   | 1.1                               | 0.9                     | 0.4                      | 0.8                      |
|                                                 | Mulla et al., 2005         | 0.5                 | 0.8                                | 0.9                   | 2.1                   | 0.4                   | 0.7                               | 1.5                     | 0.6                      | 0.8                      |
|                                                 | Okada et al., 2018         | 2.2                 | 2.4                                | 1.0                   | 1.3                   | 4.6                   | 1.4                               | 1.4                     | 3.2                      | 2.0                      |
|                                                 | Purwonugroho et al., 2012  | 0.2                 | 0.3                                | 0.2                   | 0.6                   | 0.2                   | 3.0                               | 0.2                     | 0.3                      | 0.4                      |
|                                                 | Sánchez et al., 2010       | 0.9                 | 1.2                                | 1.3                   | 3.0                   | 0.7                   | 0.8                               | 4.2                     | 0.4                      | 2.0                      |
|                                                 | Yamamoto et al., 2009      | 2.0                 | 1.9                                | 0.8                   | 0.9                   | 2.7                   | 1.6                               | 0.8                     | 3.9                      | 1.8                      |
|                                                 | Yasuhara et al., 1998      | 0.4                 | 0.1                                | 0.3                   | 0.5                   | 0.4                   | 0.4                               | 0.7                     | 0.4                      | 1.4                      |
| <b>Peak and Trough Sampling at Steady-State</b> |                            |                     |                                    |                       |                       |                       |                                   |                         |                          |                          |
| P                                               | Lim et al., 2014           | 1.8                 | 0.9                                | 0.1                   | 0.2                   | 0.5                   | 0.8                               | 0.5                     | 0.5                      | 0.6                      |

|  |                            |     |     |     |     |     |     |     |     |     |
|--|----------------------------|-----|-----|-----|-----|-----|-----|-----|-----|-----|
|  | Llopis-Salvia et al., 2006 | 0.8 | 1.1 | 0.4 | 0.3 | 0.5 | 0.5 | 0.6 | 0.6 | 0.5 |
|  | Moore et al., 2016         | 1.1 | 0.9 | 5.2 | 0.8 | 0.3 | 1.1 | 0.8 | 0.9 | 0.9 |
|  | Mulla et al., 2005         | 1.2 | 1.3 | 1.8 | 3.7 | 1.4 | 2.1 | 2.0 | 0.7 | 1.6 |
|  | Okada et al., 2018         | 2.2 | 1.9 | 0.8 | 2.4 | 4.8 | 2.5 | 1.8 | 2.6 | 2.2 |
|  | Purwonugroho et al., 2012  | 0.5 | 0.5 | 0.3 | 0.4 | 0.5 | 1.4 | 0.5 | 0.6 | 0.3 |
|  | Sánchez et al., 2010       | 1.2 | 1.6 | 0.8 | 1.9 | 0.7 | 0.9 | 3.4 | 0.4 | 1.5 |
|  | Yamamoto et al., 2009      | 1.9 | 2.5 | 1.2 | 1.2 | 2.0 | 1.7 | 1.2 | 4.3 | 2.1 |
|  | Yasuhara et al., 1998      | 0.5 | 0.3 | 0.4 | 0.2 | 0.4 | 0.2 | 0.2 | 0.4 | 1.3 |

**Peak, Mid, and Trough Sampling at Single Dose**

|                 |                            |     |     |     |     |     |     |     |     |     |
|-----------------|----------------------------|-----|-----|-----|-----|-----|-----|-----|-----|-----|
| Predicted Class | Lim et al., 2014           | 3.0 | 0.8 | 0.1 | 0.1 | 0.3 | 0.7 | 0.2 | 0.5 | 0.9 |
|                 | Llopis-Salvia et al., 2006 | 1.2 | 3.8 | 0.2 | 0.6 | 0.3 | 0.9 | 0.9 | 1.1 | 1.5 |
|                 | Moore et al., 2016         | 0.4 | 0.4 | 7.9 | 2.0 | 0.7 | 0.6 | 0.8 | 0.5 | 0.5 |
|                 | Mulla et al., 2005         | 0.5 | 0.3 | 0.9 | 3.2 | 0.6 | 0.8 | 1.6 | 0.2 | 0.4 |
|                 | Okada et al., 2018         | 2.0 | 1.3 | 1.4 | 1.8 | 6.9 | 1.2 | 1.4 | 1.2 | 0.9 |
|                 | Purwonugroho et al., 2012  | 0.3 | 0.2 | 0.0 | 0.5 | 0.1 | 4.6 | 0.1 | 0.1 | 0.3 |
|                 | Sánchez et al., 2010       | 0.7 | 0.8 | 0.1 | 1.7 | 0.4 | 0.6 | 4.0 | 0.3 | 1.6 |
|                 | Yamamoto et al., 2009      | 2.2 | 2.6 | 0.4 | 0.7 | 1.7 | 1.0 | 1.0 | 6.5 | 2.6 |
|                 | Yasuhara et al., 1998      | 0.7 | 0.9 | 0.0 | 0.5 | 0.1 | 0.7 | 1.0 | 0.6 | 2.5 |

**Peak, Mid, and Trough Sampling at Steady-State**

|                 |                            |     |     |     |     |     |     |     |     |     |
|-----------------|----------------------------|-----|-----|-----|-----|-----|-----|-----|-----|-----|
| Predicted Class | Lim et al., 2014           | 1.9 | 0.8 | 0.0 | 0.1 | 0.4 | 0.5 | 0.5 | 0.5 | 0.7 |
|                 | Llopis-Salvia et al., 2006 | 1.1 | 1.8 | 0.1 | 0.3 | 0.3 | 0.7 | 0.9 | 0.7 | 1.0 |
|                 | Moore et al., 2016         | 1.3 | 1.2 | 7.4 | 1.3 | 1.1 | 1.1 | 1.1 | 1.1 | 0.7 |
|                 | Mulla et al., 2005         | 0.9 | 0.9 | 1.5 | 3.9 | 1.2 | 1.3 | 1.7 | 0.6 | 0.9 |
|                 | Okada et al., 2018         | 1.8 | 1.2 | 0.9 | 2.2 | 4.9 | 1.3 | 1.6 | 1.6 | 1.4 |
|                 | Purwonugroho et al., 2012  | 0.6 | 0.7 | 0.2 | 0.5 | 0.5 | 3.0 | 0.4 | 0.7 | 0.6 |
|                 | Sánchez et al., 2010       | 1.0 | 1.3 | 0.1 | 1.1 | 0.4 | 0.6 | 3.0 | 0.3 | 1.3 |
|                 | Yamamoto et al., 2009      | 1.8 | 2.5 | 0.7 | 1.2 | 2.1 | 2.0 | 1.3 | 5.1 | 2.3 |
|                 | Yasuhara et al., 1998      | 0.7 | 0.7 | 0.1 | 0.4 | 0.3 | 0.6 | 0.5 | 0.5 | 2.2 |

**One-hour Interval Sampling at Single Dose**

|                 |                            |     |     |      |     |     |     |     |     |     |
|-----------------|----------------------------|-----|-----|------|-----|-----|-----|-----|-----|-----|
| Predicted Class | Lim et al., 2014           | 4.4 | 0.9 | 0.0  | 0.2 | 0.2 | 0.3 | 0.1 | 0.2 | 0.8 |
|                 | Llopis-Salvia et al., 2006 | 1.9 | 5.8 | 0.0  | 0.4 | 0.1 | 0.3 | 0.7 | 0.4 | 1.0 |
|                 | Moore et al., 2016         | 0.1 | 0.0 | 10.5 | 0.5 | 0.1 | 0.0 | 0.1 | 0.3 | 0.1 |
|                 | Mulla et al., 2005         | 0.4 | 0.3 | 0.0  | 7.0 | 0.5 | 0.6 | 1.4 | 0.2 | 0.2 |
|                 | Okada et al., 2018         | 1.7 | 0.8 | 0.3  | 1.0 | 9.8 | 0.1 | 0.3 | 0.7 | 0.2 |
|                 | Purwonugroho et al., 2012  | 0.0 | 0.0 | 0.0  | 0.3 | 0.0 | 9.1 | 0.0 | 0.0 | 0.0 |
|                 | Sánchez et al., 2010       | 0.7 | 0.7 | 0.0  | 1.1 | 0.0 | 0.4 | 6.9 | 0.2 | 1.6 |

|                                                   |                            |     |     |      |     |     |     |     |     |     |
|---------------------------------------------------|----------------------------|-----|-----|------|-----|-----|-----|-----|-----|-----|
|                                                   | Yamamoto et al., 2009      | 1.2 | 1.1 | 0.2  | 0.3 | 0.3 | 0.0 | 0.2 | 8.9 | 1.1 |
|                                                   | Yasuhara et al., 1998      | 0.7 | 1.4 | 0.0  | 0.2 | 0.0 | 0.2 | 1.3 | 0.3 | 6.1 |
| <b>One-hour Interval Sampling at Steady-State</b> |                            |     |     |      |     |     |     |     |     |     |
| <b>Predicted Class</b>                            | Lim et al., 2014           | 3.2 | 1.0 | 0.0  | 0.2 | 0.2 | 0.2 | 0.3 | 0.1 | 0.6 |
|                                                   | Llopis-Salvia et al., 2006 | 1.4 | 2.9 | 0.0  | 0.1 | 0.0 | 0.4 | 1.0 | 0.2 | 1.2 |
|                                                   | Moore et al., 2016         | 0.1 | 0.1 | 10.0 | 0.8 | 0.2 | 0.2 | 0.2 | 0.7 | 0.1 |
|                                                   | Mulla et al., 2005         | 1.0 | 0.5 | 0.2  | 6.2 | 0.9 | 1.2 | 1.3 | 0.4 | 0.5 |
|                                                   | Okada et al., 2018         | 2.2 | 1.2 | 0.3  | 1.5 | 7.9 | 0.9 | 0.7 | 1.2 | 0.6 |
|                                                   | Purwonugroho et al., 2012  | 0.2 | 0.4 | 0.1  | 0.4 | 0.2 | 6.0 | 0.2 | 0.4 | 0.2 |
|                                                   | Sánchez et al., 2010       | 1.2 | 2.2 | 0.0  | 0.7 | 0.1 | 0.5 | 5.9 | 0.1 | 1.9 |
|                                                   | Yamamoto et al., 2009      | 1.2 | 1.6 | 0.5  | 1.1 | 1.7 | 1.3 | 0.5 | 7.8 | 1.4 |
|                                                   | Yasuhara et al., 1998      | 0.6 | 1.2 | 0.0  | 0.1 | 0.0 | 0.4 | 1.1 | 0.2 | 4.7 |

**Table S7.** The precision, recall, and F1-Score of the random forest (RF) model in each scenario.

| Sampling Scenarios               | Trough (%) |        |          | Peak and Trough (%) |        |          | Peak, Mid, and Trough (%) |        |          | One-hour Interval (%) |        |          |
|----------------------------------|------------|--------|----------|---------------------|--------|----------|---------------------------|--------|----------|-----------------------|--------|----------|
| Measures                         | Preci-sion | Recall | F1-Score | Preci-sion          | Recall | F1-Score | Preci-sion                | Recall | F1-Score | Preci-sion            | Recall | F1-Score |
| <b>Class in the Single Dose</b>  |            |        |          |                     |        |          |                           |        |          |                       |        |          |
| Lim et al., 2014                 | 15.6       | 11.6   | 13.3     | 37.7                | 27.6   | 31.9     | 45.2                      | 27.4   | 34.1     | 61.9                  | 39.4   | 48.1     |
| Llopis-Salvia et al., 2006       | 23.0       | 39.3   | 29.0     | 24.4                | 27.6   | 25.9     | 36.4                      | 34.4   | 35.4     | 54.6                  | 52.5   | 53.5     |
| Moore et al., 2016               | 53.1       | 40.6   | 46.0     | 49.7                | 48.7   | 49.2     | 57.4                      | 71.2   | 63.5     | 89.3                  | 94.6   | 91.9     |
| Mulla et al., 2005               | 23.0       | 13.7   | 17.2     | 25.4                | 18.7   | 21.6     | 37.5                      | 29.2   | 32.8     | 64.8                  | 63.1   | 63.9     |
| Okada et al., 2018               | 18.5       | 36.4   | 24.6     | 23.5                | 41.0   | 29.8     | 38.1                      | 62.4   | 47.3     | 65.7                  | 88.0   | 75.2     |
| Purwonugroho et al., 2012        | 61.5       | 20.0   | 30.2     | 56.7                | 27.2   | 36.8     | 74.5                      | 41.8   | 53.6     | 96.6                  | 82.0   | 88.7     |
| Sánchez et al., 2010             | 16.9       | 22.7   | 19.4     | 29.3                | 38.0   | 33.1     | 39.0                      | 35.9   | 37.4     | 59.1                  | 62.5   | 60.8     |
| Yamamoto et al., 2009            | 17.0       | 10.7   | 13.1     | 23.6                | 34.7   | 28.1     | 34.7                      | 58.3   | 43.5     | 66.6                  | 80.5   | 72.9     |
| Yasuhara et al., 1998            | 17.2       | 15.9   | 16.5     | 30.0                | 12.8   | 18.0     | 35.6                      | 22.4   | 27.5     | 59.7                  | 54.7   | 57.1     |
| <b>Class in the Steady-State</b> |            |        |          |                     |        |          |                           |        |          |                       |        |          |
| Lim et al., 2014                 | 14.6       | 8.6    | 10.8     | 29.5                | 16.1   | 20.8     | 35.6                      | 17.0   | 23.0     | 54.7                  | 28.4   | 37.4     |
| Llopis-Salvia et al., 2006       | 16.7       | 20.8   | 18.5     | 20.6                | 9.9    | 13.4     | 26.2                      | 16.1   | 19.9     | 40.1                  | 25.8   | 31.4     |
| Moore et al., 2016               | 42.7       | 31.0   | 35.9     | 43.5                | 47.0   | 45.2     | 45.6                      | 66.4   | 54.0     | 80.5                  | 89.7   | 84.9     |
| Mulla et al., 2005               | 20.4       | 27.3   | 23.4     | 23.3                | 33.2   | 27.4     | 30.2                      | 35.4   | 32.6     | 51.0                  | 55.8   | 53.3     |
| Okada et al., 2018               | 16.5       | 25.0   | 19.9     | 22.6                | 43.4   | 29.7     | 29.0                      | 44.5   | 35.1     | 47.3                  | 70.8   | 56.7     |
| Purwonugroho et al., 2012        | 14.1       | 6.5    | 8.9      | 28.2                | 12.7   | 17.5     | 41.3                      | 27.4   | 33.0     | 74.5                  | 54.1   | 62.7     |
| Sánchez et al., 2010             | 16.7       | 21.0   | 18.6     | 27.3                | 30.7   | 28.9     | 33.2                      | 27.4   | 30.0     | 47.2                  | 53.0   | 49.9     |
| Yamamoto et al., 2009            | 17.0       | 19.5   | 18.2     | 23.7                | 38.5   | 29.3     | 26.7                      | 45.7   | 33.7     | 45.8                  | 70.1   | 55.4     |
| Yasuhara et al., 1998            | 16.3       | 11.9   | 13.8     | 33.2                | 11.5   | 17.1     | 36.6                      | 19.9   | 25.8     | 55.9                  | 42.1   | 48.0     |

Table S8. The confusion matrix of the XGBoost model in each scenario.

| Actual Class (%)                         |                            | Lim et al.,<br>2014 | Llopis-Sal-<br>via et al.,<br>2006 | Moore et al.,<br>2016 | Mulla et al.,<br>2005 | Okada et al.,<br>2018 | Pur-<br>wonugroho<br>et al., 2012 | Sanchez et<br>al., 2010 | Yamamoto<br>et al., 2009 | Yasuhara et<br>al., 1998 |
|------------------------------------------|----------------------------|---------------------|------------------------------------|-----------------------|-----------------------|-----------------------|-----------------------------------|-------------------------|--------------------------|--------------------------|
| Trough Sampling at Single Dose           |                            |                     |                                    |                       |                       |                       |                                   |                         |                          |                          |
| Predicted Class                          | Lim et al., 2014           | 0.6                 | 0.4                                | 0.2                   | 0.3                   | 0.4                   | 0.3                               | 0.4                     | 0.4                      | 0.3                      |
|                                          | Llopis-Salvia et al., 2006 | 2.9                 | 4.6                                | 1.5                   | 1.3                   | 1.9                   | 1.5                               | 1.3                     | 3.1                      | 1.7                      |
|                                          | Moore et al., 2016         | 0.3                 | 0.2                                | 4.5                   | 1.0                   | 0.0                   | 1.2                               | 0.5                     | 0.1                      | 0.4                      |
|                                          | Mulla et al., 2005         | 0.1                 | 0.2                                | 0.4                   | 1.2                   | 0.1                   | 0.6                               | 0.7                     | 0.2                      | 0.5                      |
|                                          | Okada et al., 2018         | 4.5                 | 3.9                                | 1.8                   | 2.9                   | 6.3                   | 2.5                               | 4.0                     | 4.2                      | 4.4                      |
|                                          | Purwonugroho et al., 2012  | 0.0                 | 0.1                                | 0.3                   | 0.4                   | 0.0                   | 2.2                               | 0.0                     | 0.1                      | 0.0                      |
|                                          | Sánchez et al., 2010       | 1.9                 | 1.2                                | 1.5                   | 2.8                   | 1.5                   | 1.7                               | 3.3                     | 1.6                      | 1.9                      |
|                                          | Yamamoto et al., 2009      | 0.3                 | 0.3                                | 0.2                   | 0.1                   | 0.3                   | 0.4                               | 0.1                     | 0.5                      | 0.2                      |
|                                          | Yasuhara et al., 1998      | 0.4                 | 0.3                                | 0.7                   | 1.1                   | 0.5                   | 0.7                               | 0.9                     | 0.9                      | 1.6                      |
| Trough Sampling at Steady-State          |                            |                     |                                    |                       |                       |                       |                                   |                         |                          |                          |
| Predicted Class                          | Lim et al., 2014           | 0.3                 | 0.1                                | 0.2                   | 0.1                   | 0.1                   | 0.2                               | 0.2                     | 0.0                      | 0.1                      |
|                                          | Llopis-Salvia et al., 2006 | 2.0                 | 2.7                                | 1.5                   | 0.9                   | 1.1                   | 1.6                               | 1.8                     | 2.3                      | 1.5                      |
|                                          | Moore et al., 2016         | 0.8                 | 0.5                                | 3.5                   | 0.8                   | 0.1                   | 1.7                               | 0.2                     | 0.5                      | 0.4                      |
|                                          | Mulla et al., 2005         | 1.5                 | 0.8                                | 1.1                   | 3.0                   | 1.5                   | 1.5                               | 1.2                     | 1.1                      | 1.7                      |
|                                          | Okada et al., 2018         | 3.1                 | 3.3                                | 1.8                   | 3.8                   | 5.6                   | 3.3                               | 4.2                     | 3.0                      | 3.7                      |
|                                          | Purwonugroho et al., 2012  | 0.0                 | 0.0                                | 0.0                   | 0.0                   | 0.0                   | 0.0                               | 0.0                     | 0.0                      | 0.0                      |
|                                          | Sánchez et al., 2010       | 1.9                 | 1.9                                | 1.2                   | 1.7                   | 1.7                   | 1.9                               | 2.5                     | 1.2                      | 1.0                      |
|                                          | Yamamoto et al., 2009      | 1.2                 | 1.5                                | 1.1                   | 0.6                   | 0.9                   | 0.7                               | 0.8                     | 2.4                      | 1.9                      |
|                                          | Yasuhara et al., 1998      | 0.4                 | 0.3                                | 0.6                   | 0.3                   | 0.2                   | 0.3                               | 0.1                     | 0.5                      | 0.8                      |
| Peak and Trough Sampling at Single Dose  |                            |                     |                                    |                       |                       |                       |                                   |                         |                          |                          |
| Predicted Class                          | Lim et al., 2014           | 3.0                 | 0.9                                | 0.1                   | 0.1                   | 0.9                   | 0.9                               | 0.2                     | 0.6                      | 0.9                      |
|                                          | Llopis-Salvia et al., 2006 | 1.6                 | 3.4                                | 1.1                   | 1.2                   | 1.0                   | 1.0                               | 1.1                     | 1.4                      | 1.0                      |
|                                          | Moore et al., 2016         | 0.2                 | 0.3                                | 5.0                   | 1.1                   | 0.1                   | 1.2                               | 0.6                     | 0.3                      | 0.5                      |
|                                          | Mulla et al., 2005         | 0.5                 | 0.5                                | 1.0                   | 2.1                   | 0.4                   | 0.9                               | 1.2                     | 0.6                      | 0.7                      |
|                                          | Okada et al., 2018         | 2.6                 | 2.6                                | 1.5                   | 1.8                   | 5.7                   | 1.8                               | 1.9                     | 3.8                      | 2.3                      |
|                                          | Purwonugroho et al., 2012  | 0.3                 | 0.2                                | 0.2                   | 0.5                   | 0.1                   | 2.8                               | 0.1                     | 0.2                      | 0.3                      |
|                                          | Sánchez et al., 2010       | 0.9                 | 1.3                                | 1.3                   | 3.0                   | 0.7                   | 0.9                               | 4.9                     | 0.3                      | 2.3                      |
|                                          | Yamamoto et al., 2009      | 1.9                 | 1.8                                | 0.6                   | 0.9                   | 2.1                   | 1.4                               | 0.7                     | 3.8                      | 1.9                      |
|                                          | Yasuhara et al., 1998      | 0.3                 | 0.1                                | 0.2                   | 0.3                   | 0.1                   | 0.2                               | 0.4                     | 0.2                      | 1.1                      |
| Peak and Trough Sampling at Steady-State |                            |                     |                                    |                       |                       |                       |                                   |                         |                          |                          |
| P                                        | Lim et al., 2014           | 1.8                 | 0.9                                | 0.1                   | 0.2                   | 0.5                   | 0.8                               | 0.6                     | 0.4                      | 0.6                      |

|  |                            |     |     |     |     |     |     |     |     |     |
|--|----------------------------|-----|-----|-----|-----|-----|-----|-----|-----|-----|
|  | Llopis-Salvia et al., 2006 | 0.6 | 1.0 | 0.4 | 0.2 | 0.2 | 0.4 | 0.3 | 0.4 | 0.5 |
|  | Moore et al., 2016         | 1.1 | 0.8 | 4.9 | 0.7 | 0.3 | 1.2 | 0.7 | 0.7 | 0.9 |
|  | Mulla et al., 2005         | 1.4 | 1.5 | 2.0 | 4.1 | 1.6 | 1.6 | 2.2 | 1.0 | 1.8 |
|  | Okada et al., 2018         | 2.4 | 2.3 | 1.0 | 2.7 | 5.3 | 2.8 | 2.0 | 3.0 | 2.5 |
|  | Purwonugroho et al., 2012  | 0.4 | 0.3 | 0.3 | 0.4 | 0.3 | 1.6 | 0.4 | 0.5 | 0.3 |
|  | Sánchez et al., 2010       | 1.2 | 1.6 | 0.8 | 1.7 | 0.7 | 0.9 | 3.5 | 0.4 | 1.4 |
|  | Yamamoto et al., 2009      | 1.9 | 2.4 | 1.2 | 1.0 | 1.9 | 1.7 | 1.3 | 4.4 | 2.0 |
|  | Yasuhara et al., 1998      | 0.4 | 0.3 | 0.4 | 0.2 | 0.3 | 0.2 | 0.2 | 0.2 | 1.2 |

**Peak, Mid, and Trough Sampling at Single Dose**

|                 |                            |     |     |     |     |     |     |     |     |     |
|-----------------|----------------------------|-----|-----|-----|-----|-----|-----|-----|-----|-----|
| Predicted Class | Lim et al., 2014           | 2.9 | 0.7 | 0.0 | 0.1 | 0.3 | 0.7 | 0.2 | 0.4 | 0.9 |
|                 | Llopis-Salvia et al., 2006 | 1.3 | 3.8 | 0.2 | 0.5 | 0.3 | 0.8 | 0.9 | 1.2 | 1.4 |
|                 | Moore et al., 2016         | 0.4 | 0.5 | 7.9 | 1.9 | 0.8 | 0.6 | 0.9 | 0.7 | 0.4 |
|                 | Mulla et al., 2005         | 0.5 | 0.3 | 0.9 | 3.2 | 0.6 | 0.9 | 1.5 | 0.2 | 0.4 |
|                 | Okada et al., 2018         | 2.0 | 1.3 | 1.5 | 1.9 | 7.0 | 1.2 | 1.3 | 1.1 | 0.9 |
|                 | Purwonugroho et al., 2012  | 0.3 | 0.2 | 0.0 | 0.5 | 0.0 | 4.5 | 0.1 | 0.1 | 0.4 |
|                 | Sánchez et al., 2010       | 0.6 | 0.8 | 0.1 | 1.8 | 0.3 | 0.6 | 4.2 | 0.3 | 1.5 |
|                 | Yamamoto et al., 2009      | 2.4 | 2.7 | 0.4 | 0.8 | 1.6 | 1.1 | 1.1 | 6.7 | 2.8 |
|                 | Yasuhara et al., 1998      | 0.7 | 0.8 | 0.1 | 0.5 | 0.0 | 0.8 | 0.9 | 0.5 | 2.4 |

**Peak, Mid, and Trough Sampling at Steady-State**

|                 |                            |     |     |     |     |     |     |     |     |     |
|-----------------|----------------------------|-----|-----|-----|-----|-----|-----|-----|-----|-----|
| Predicted Class | Lim et al., 2014           | 1.7 | 0.7 | 0.0 | 0.1 | 0.3 | 0.4 | 0.5 | 0.3 | 0.5 |
|                 | Llopis-Salvia et al., 2006 | 1.0 | 1.7 | 0.0 | 0.2 | 0.2 | 0.6 | 0.9 | 0.6 | 1.0 |
|                 | Moore et al., 2016         | 1.3 | 1.2 | 7.4 | 1.4 | 1.1 | 1.1 | 1.1 | 1.0 | 0.8 |
|                 | Mulla et al., 2005         | 1.0 | 0.8 | 1.6 | 4.0 | 1.2 | 1.3 | 1.8 | 0.7 | 1.0 |
|                 | Okada et al., 2018         | 1.7 | 1.3 | 0.9 | 2.1 | 5.1 | 1.4 | 1.7 | 1.5 | 1.5 |
|                 | Purwonugroho et al., 2012  | 0.6 | 0.5 | 0.2 | 0.5 | 0.3 | 3.1 | 0.4 | 0.6 | 0.5 |
|                 | Sánchez et al., 2010       | 1.1 | 1.3 | 0.1 | 1.0 | 0.3 | 0.6 | 2.9 | 0.2 | 1.2 |
|                 | Yamamoto et al., 2009      | 2.1 | 2.9 | 0.7 | 1.4 | 2.4 | 2.1 | 1.4 | 5.7 | 2.5 |
|                 | Yasuhara et al., 1998      | 0.6 | 0.6 | 0.1 | 0.3 | 0.2 | 0.4 | 0.4 | 0.5 | 2.1 |

**One-hour Interval Sampling at Single Dose**

|                 |                            |     |     |      |     |     |     |     |     |     |
|-----------------|----------------------------|-----|-----|------|-----|-----|-----|-----|-----|-----|
| Predicted Class | Lim et al., 2014           | 4.7 | 0.9 | 0.0  | 0.3 | 0.1 | 0.2 | 0.1 | 0.1 | 0.6 |
|                 | Llopis-Salvia et al., 2006 | 1.7 | 5.6 | 0.0  | 0.3 | 0.1 | 0.1 | 0.6 | 0.1 | 0.9 |
|                 | Moore et al., 2016         | 0.0 | 0.0 | 11.0 | 0.5 | 0.2 | 0.0 | 0.1 | 0.3 | 0.0 |
|                 | Mulla et al., 2005         | 0.3 | 0.3 | 0.0  | 7.5 | 0.3 | 0.9 | 1.4 | 0.1 | 0.3 |
|                 | Okada et al., 2018         | 1.6 | 0.5 | 0.0  | 0.8 | 9.8 | 0.0 | 0.2 | 0.3 | 0.1 |
|                 | Purwonugroho et al., 2012  | 0.0 | 0.0 | 0.0  | 0.0 | 0.0 | 9.2 | 0.0 | 0.0 | 0.0 |
|                 | Sánchez et al., 2010       | 0.5 | 0.7 | 0.0  | 1.0 | 0.0 | 0.3 | 7.0 | 0.1 | 1.2 |

|                                            |                            |     |     |      |     |     |     |     |      |     |
|--------------------------------------------|----------------------------|-----|-----|------|-----|-----|-----|-----|------|-----|
|                                            | Yamamoto et al., 2009      | 1.2 | 1.5 | 0.1  | 0.4 | 0.6 | 0.0 | 0.3 | 10.0 | 1.1 |
|                                            | Yasuhara et al., 1998      | 1.0 | 1.6 | 0.0  | 0.2 | 0.0 | 0.3 | 1.4 | 0.1  | 6.8 |
| One-hour Interval Sampling at Steady-State |                            |     |     |      |     |     |     |     |      |     |
| Predicted Class                            | Lim et al., 2014           | 3.4 | 1.0 | 0.0  | 0.1 | 0.2 | 0.3 | 0.4 | 0.0  | 0.6 |
|                                            | Llopis-Salvia et al., 2006 | 1.2 | 3.0 | 0.0  | 0.1 | 0.0 | 0.4 | 1.3 | 0.0  | 1.2 |
|                                            | Moore et al., 2016         | 0.1 | 0.1 | 10.7 | 1.0 | 0.3 | 0.3 | 0.1 | 0.7  | 0.1 |
|                                            | Mulla et al., 2005         | 0.7 | 0.6 | 0.0  | 6.4 | 0.9 | 1.1 | 1.4 | 0.4  | 0.5 |
|                                            | Okada et al., 2018         | 2.2 | 1.2 | 0.0  | 1.3 | 7.2 | 0.5 | 0.5 | 0.8  | 0.5 |
|                                            | Purwonugroho et al., 2012  | 0.4 | 0.7 | 0.1  | 0.3 | 0.3 | 6.9 | 0.3 | 0.7  | 0.4 |
|                                            | Sánchez et al., 2010       | 1.0 | 1.6 | 0.0  | 0.5 | 0.1 | 0.3 | 5.4 | 0.0  | 1.3 |
|                                            | Yamamoto et al., 2009      | 1.3 | 1.4 | 0.2  | 1.2 | 2.1 | 1.0 | 0.5 | 8.5  | 1.3 |
|                                            | Yasuhara et al., 1998      | 0.8 | 1.4 | 0.0  | 0.1 | 0.0 | 0.4 | 1.1 | 0.1  | 5.2 |

**Table S9.** The precision, recall, and F1-Score of XGBoost in each scenario.

| Sampling Scenarios               | Trough (%) |        |          | Peak and Trough (%) |        |          | Peak, Mid, and Trough (%) |        |          | One-hour Interval (%) |        |          |
|----------------------------------|------------|--------|----------|---------------------|--------|----------|---------------------------|--------|----------|-----------------------|--------|----------|
| Measures                         | Preci-sion | Recall | F1-Score | Preci-sion          | Recall | F1-Score | Preci-sion                | Recall | F1-Score | Preci-sion            | Recall | F1-Score |
| <b>Class in the Single Dose</b>  |            |        |          |                     |        |          |                           |        |          |                       |        |          |
| Lim et al., 2014                 | 17.2       | 5.0    | 7.7      | 38.7                | 26.8   | 31.7     | 46.5                      | 26.1   | 33.4     | 65.8                  | 42.1   | 51.3     |
| Llopis-Salvia et al., 2006       | 23.3       | 41.2   | 29.7     | 26.5                | 30.3   | 28.3     | 36.6                      | 34.6   | 35.6     | 59.4                  | 50.3   | 54.5     |
| Moore et al., 2016               | 54.0       | 40.4   | 46.2     | 54.4                | 45.4   | 49.5     | 56.3                      | 71.1   | 62.8     | 89.5                  | 98.6   | 93.8     |
| Mulla et al., 2005               | 29.1       | 10.4   | 15.3     | 26.8                | 19.1   | 22.3     | 37.7                      | 28.6   | 32.5     | 67.4                  | 67.6   | 67.5     |
| Okada et al., 2018               | 18.1       | 56.5   | 27.4     | 23.8                | 51.6   | 32.6     | 38.7                      | 63.2   | 48.0     | 72.9                  | 88.6   | 80.0     |
| Purwonugroho et al., 2012        | 67.8       | 19.6   | 30.4     | 58.5                | 24.9   | 34.9     | 74.7                      | 40.8   | 52.8     | 99.0                  | 82.9   | 90.3     |
| Sánchez et al., 2010             | 18.7       | 29.4   | 22.9     | 31.1                | 44.0   | 36.5     | 41.0                      | 38.1   | 39.5     | 64.7                  | 63.2   | 63.9     |
| Yamamoto et al., 2009            | 20.1       | 4.4    | 7.2      | 25.5                | 34.4   | 29.3     | 34.0                      | 60.0   | 43.4     | 65.7                  | 89.9   | 75.9     |
| Yasuhara et al., 1998            | 23.3       | 14.8   | 18.1     | 37.3                | 9.8    | 15.5     | 36.1                      | 21.6   | 27.0     | 60.3                  | 60.8   | 60.5     |
| <b>Class in the Steady-State</b> |            |        |          |                     |        |          |                           |        |          |                       |        |          |
| Lim et al., 2014                 | 24.0       | 2.5    | 4.5      | 31.2                | 16.2   | 21.3     | 37.4                      | 15.7   | 22.1     | 56.4                  | 30.5   | 39.6     |
| Llopis-Salvia et al., 2006       | 17.4       | 24.2   | 20.2     | 24.9                | 9.0    | 13.2     | 27.8                      | 15.6   | 20.0     | 40.9                  | 26.9   | 32.4     |
| Moore et al., 2016               | 41.9       | 31.9   | 36.2     | 43.6                | 44.0   | 43.8     | 45.2                      | 66.7   | 53.9     | 80.1                  | 96.3   | 87.5     |
| Mulla et al., 2005               | 22.2       | 26.9   | 24.3     | 23.9                | 36.8   | 29.0     | 29.4                      | 35.6   | 32.2     | 53.0                  | 57.5   | 55.2     |
| Okada et al., 2018               | 17.7       | 50.2   | 26.1     | 22.2                | 48.0   | 30.3     | 29.7                      | 45.9   | 36.1     | 50.6                  | 65.2   | 57.0     |
| Purwonugroho et al., 2012        | 5.9        | 0.1    | 0.2      | 35.7                | 14.7   | 20.8     | 45.8                      | 27.6   | 34.5     | 68.0                  | 61.7   | 64.7     |
| Sánchez et al., 2010             | 16.6       | 22.4   | 19.1     | 28.8                | 31.6   | 30.1     | 33.1                      | 26.3   | 29.3     | 52.5                  | 48.3   | 50.3     |
| Yamamoto et al., 2009            | 21.4       | 21.4   | 21.4     | 24.8                | 39.6   | 30.5     | 26.6                      | 50.9   | 35.0     | 48.3                  | 76.2   | 59.1     |
| Yasuhara et al., 1998            | 22.5       | 7.3    | 11.0     | 36.1                | 10.7   | 16.5     | 40.0                      | 19.1   | 25.8     | 56.6                  | 46.5   | 51.1     |



**Table S10.** The mean percent error (*MPE*) and relative root mean squared error (*rRMSE*) of the predicted AUC relative to the true AUC of each simulation scenario using objective function values (OFVs) for model selection and weighted averaging.

| Measures                   |                  | <i>MPE</i> (%) |                 |                       |                   | <i>rRMSE</i> (%) |                 |                       |                   |
|----------------------------|------------------|----------------|-----------------|-----------------------|-------------------|------------------|-----------------|-----------------------|-------------------|
| Test Model                 | Classification   | Trough         | Peak and Trough | Peak, Mid, and Trough | One-hour Interval | Trough           | Peak and Trough | Peak, Mid, and Trough | One-hour Interval |
| <b>Internal Validation</b> |                  |                |                 |                       |                   |                  |                 |                       |                   |
| Single Dose                | Selection        | -2.65          | -1.35           | 1.16                  | 1.70              | 19.02            | 16.50           | 13.90                 | 8.31              |
|                            | Weighted Average | 0.37           | -0.75           | 1.52                  | 1.72              | 18.70            | 16.19           | 13.69                 | 8.25              |
| Steady State               | Selection        | -4.41          | -3.04           | -1.38                 | -1.41             | 16.79            | 13.11           | 10.46                 | 5.65              |
|                            | Weighted Average | -1.81          | -2.63           | -1.10                 | -1.40             | 16.10            | 12.90           | 10.20                 | 5.60              |
| <b>External Validation</b> |                  |                |                 |                       |                   |                  |                 |                       |                   |
| Single Dose                | Selection        | 8.16           | 1.07            | 3.86                  | 1.43              | 31.68            | 22.72           | 19.86                 | 11.38             |
|                            | Weighted Average | 10.91          | 1.97            | 4.16                  | 1.42              | 32.03            | 22.68           | 19.61                 | 11.28             |
| Steady State               | Selection        | 2.27           | -1.11           | 0.39                  | -0.61             | 23.54            | 17.53           | 14.78                 | 7.74              |
|                            | Weighted Average | 4.41           | -0.86           | 0.46                  | -0.64             | 23.92            | 17.38           | 14.54                 | 7.68              |

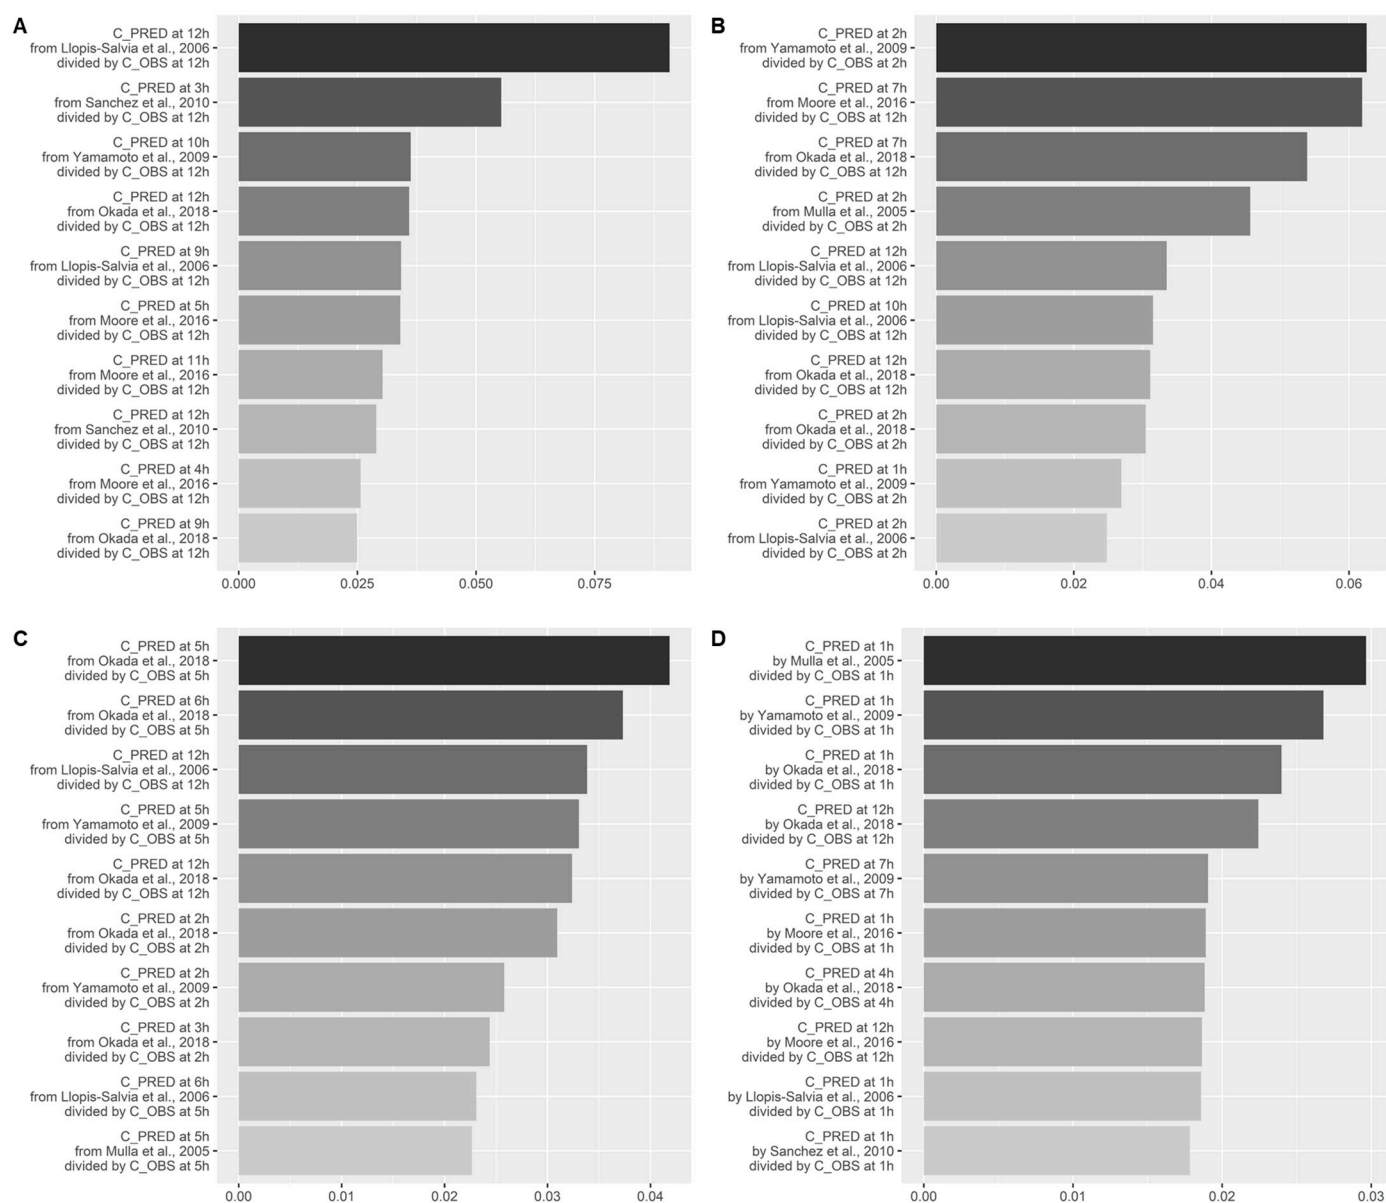

**Figure S1.** The feature importance plot of the XGBoost model in a single dose. The x-axis represents the XGBoost importance value of the feature, whereas the y-axis represents the concentration used for feature creation. Out of the 108 features created, 10 features with the highest importance values are presented. (A) Trough, (B) peak and trough, (C) peak, mid, and trough, and (D) one-hour interval sampling.

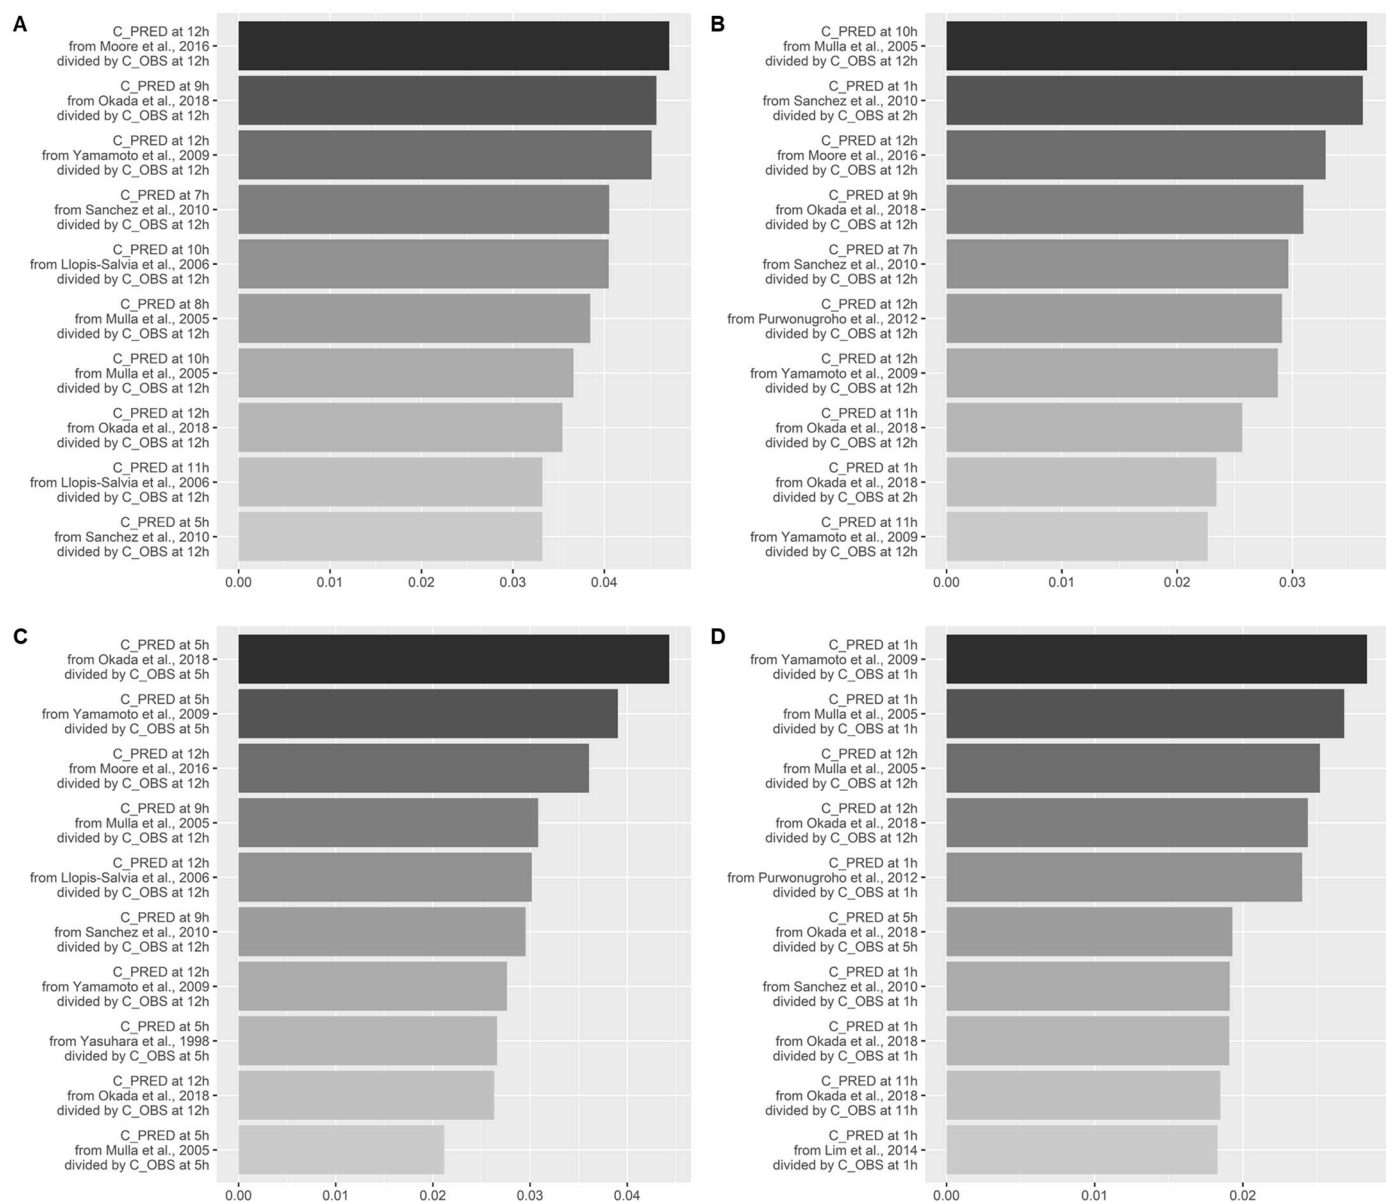

**Figure S2.** The feature importance plot of the XGBoost model in the steady state. The x-axis represents the XGBoost importance value of the feature, whereas the y-axis represents the concentration used for feature creation. Out of the 108 features created, 10 features with the highest importance values are presented. (A) Trough, (B) peak and trough, (C) peak, mid, and trough, and (D) one-hour interval sampling.
